# Supplementary material
Source: Springer Nature journal article supplement (https://www.springermedizin.de/resource/supplementary/12874_2013_949_MOESM2_ESM.pdf/9433224)

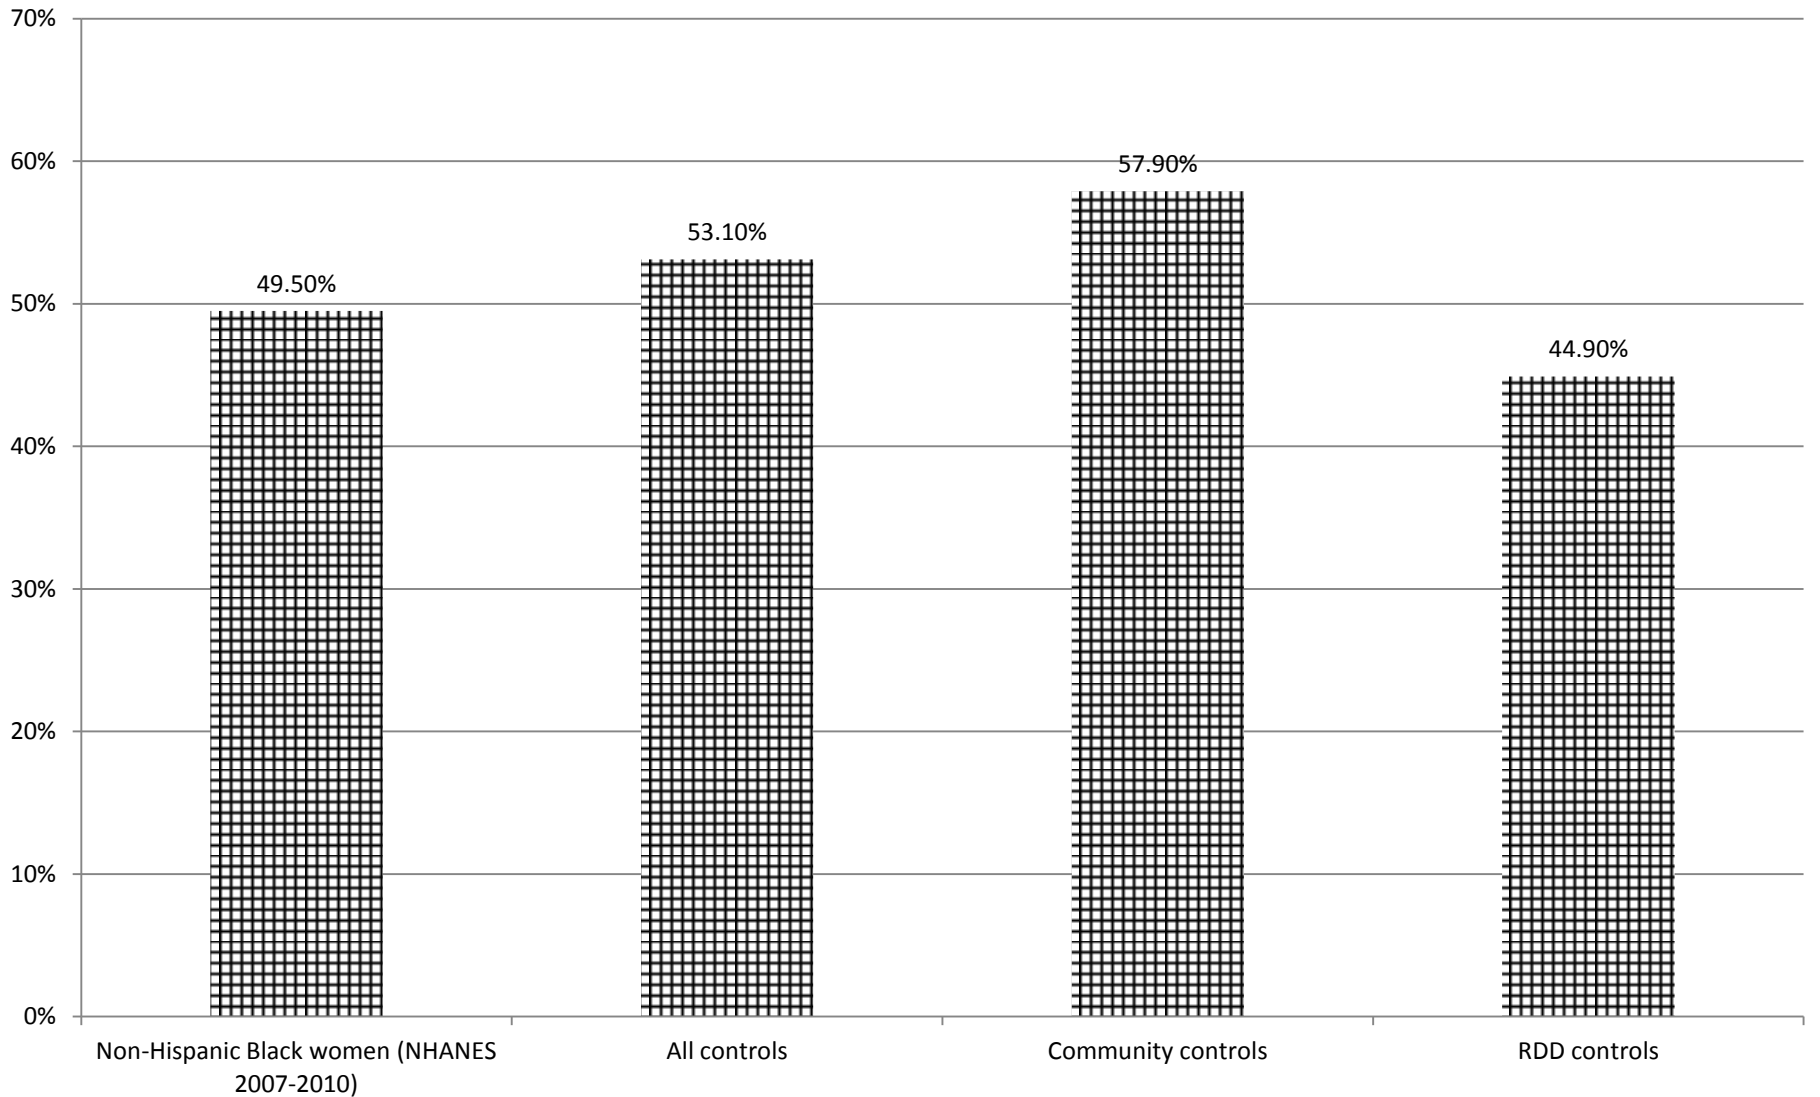

**% Obese in WCHS vs. NHANES Data  
(African American women-pre and postmenopausal)**

Supplement: MOESM2 [file 9433224]
